# Supplementary material for: Elective Surgery in Adult Patients with Excess Weight: Can Preoperative Dietary Interventions Improve Surgical Outcomes? A Systematic Review
Source: MDPI journal article supplement (doi:10.3390/nu13113775), 2021-10-25
Supplement: s1 [file s1]

| Preop diet                                         |                |              |            | Control        |              |            |               | Mean Difference              |                    | Mean Difference |   | Risk of Bias |   |   |   |   |   |   |   |   |  |  |
|----------------------------------------------------|----------------|--------------|------------|----------------|--------------|------------|---------------|------------------------------|--------------------|-----------------|---|--------------|---|---|---|---|---|---|---|---|--|--|
| Study or Subgroup                                  | Mean [minutes] | SD [minutes] | Total      | Mean [minutes] | SD [minutes] | Total      | Weight        | IV, Random, 95% CI           | IV, Random, 95% CI | A               | B | C            | D | E | F | G | H | I | J | K |  |  |
| Burnand 2016 (lap chole, VLCD)                     | 27.25          | 5.75         | 21         | 63             | 37.5         | 25         | 23.1%         | -35.75 [-50.65, -20.85]      |                    |                 |   |              |   |   |   |   |   |   |   |   |  |  |
| Hollis 2020 (various gen surg, VLCD)               | 89.9           | 29.3         | 23         | 107.5          | 41.4         | 23         | 19.5%         | -17.60 [-38.33, 3.13]        |                    |                 |   |              |   |   |   |   |   |   |   |   |  |  |
| Barth 2019 (liver resection, VLCD)                 | 246            | 72           | 30         | 258            | 90           | 30         | 10.0%         | -12.00 [-53.24, 29.24]       |                    |                 |   |              |   |   |   |   |   |   |   |   |  |  |
| de Luis 2012 (joint replacement, LCD)              | 86.5           | 21.8         | 20         | 91.8           | 41.7         | 20         | 19.6%         | -5.30 [-25.92, 15.32]        |                    |                 |   |              |   |   |   |   |   |   |   |   |  |  |
| Inoue 2019 (gastrectomy, VLCD*)                    | 368.25         | 92.75        | 27         | 372            | 56           | 23         | 9.8%          | -3.75 [-45.56, 38.06]        |                    |                 |   |              |   |   |   |   |   |   |   |   |  |  |
| Liang 2018 (hernia repair, general healthy eating) | 102.3          | 55.8         | 44         | 91             | 49.2         | 34         | 18.0%         | 11.30 [-12.05, 34.65]        |                    |                 |   |              |   |   |   |   |   |   |   |   |  |  |
| <b>Total (95% CI)</b>                              |                |              | <b>165</b> |                |              | <b>155</b> | <b>100.0%</b> | <b>-12.27 [-28.42, 3.87]</b> |                    |                 |   |              |   |   |   |   |   |   |   |   |  |  |

Heterogeneity: Tau<sup>2</sup> = 235.60; Chi<sup>2</sup> = 13.40, df = 5 (P = 0.02); I<sup>2</sup> = 63%  
Test for overall effect: Z = 1.49 (P = 0.14)
